# Supplementary material for: The Effect of Occupational Engagement on Lifestyle in Adults Living with Chronic Pain: A Systematic Review and Meta-analysis
Source: Hindawi journal article supplement (doi:10.1155/2022/7082159), 2022-06-13
Supplement: f1 [file 7082159.f1.zip]

## Appendix 6

Weighted summary plot of the methodological quality assessment with RoB 2-tool

(The proportion of the performed risk-of-bias judgements within each bias domain, measured by the cumulative weight of available judgement levels)

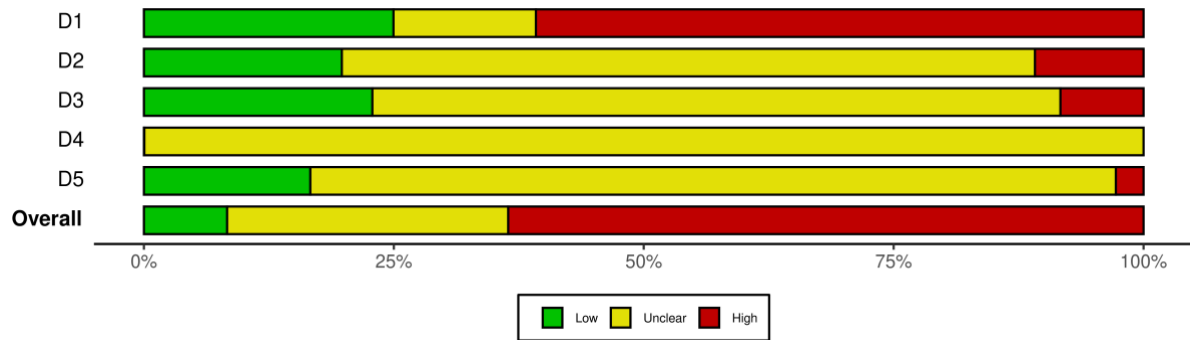

---

*Note.* D1, Risk of bias arising from the randomization process; D2, Risk of bias due to deviations from the intended interventions; D3, Missing outcome data; D4, Risk of bias in measurement of the outcome; and D5, Risk of bias in selection of the reported result
