# Supplementary material for: The Effect of Occupational Engagement on Lifestyle in Adults Living with Chronic Pain: A Systematic Review and Meta-analysis
Source: Hindawi journal article supplement (doi:10.1155/2022/7082159), 2022-06-13
Supplement: f1 [file 7082159.f1.zip]

## Appendix 5

Tabular summary of methodological assessment of the included trials

|                             | Risk of bias                                   |    |    |    |    |                                     |
|-----------------------------|------------------------------------------------|----|----|----|----|-------------------------------------|
|                             | D1                                             | D2 | D3 | D4 | D5 | Overall                             |
| Soares & Grossi, 2002       |                                                |    |    |    |    |                                     |
| Cedraschi et al., 2004      |                                                |    |    |    |    |                                     |
| Jousset et al., 2004        |                                                |    |    |    |    |                                     |
| Fontaine & Haaz, 2007       |                                                |    |    |    |    |                                     |
| Fontaine et al., 2010 & 211 |                                                |    |    |    |    |                                     |
| Ruehlman et al., 2012       |                                                |    |    |    |    |                                     |
| Cederbom et al., 2014       |                                                |    |    |    |    |                                     |
| Ismael Martins et al., 2014 |                                                |    |    |    |    |                                     |
| Bourgault et al., 2015      |                                                |    |    |    |    |                                     |
| Cederbom et al., 2019       |                                                |    |    |    |    |                                     |
| Ariza-Mateos et al., 2021   |                                                |    |    |    |    |                                     |
|                             | D1: D1<br>D2: D2<br>D3: D3<br>D4: D4<br>D5: D5 |    |    |    |    | Judgement<br>High<br>Unclear<br>Low |

*Note.* D1, Risk of bias arising from the randomization process; D2, Risk of bias due to deviations from the intended interventions; D3, Missing outcome data; D4, Risk of bias in measurement of the outcome; and D5, Risk of bias in selection of the reported results
