# Supplementary material for: The Effect of Occupational Engagement on Lifestyle in Adults Living with Chronic Pain: A Systematic Review and Meta-analysis
Source: Occup Ther Int. 2022 Jun 13;2022:7082159. doi: 10.1155/2022/7082159 (PMC9208937; doi:10.1155/2022/7082159)
Supplement: Supplementary Materials — The supplementary materials in Appendices 1-6 provide information about the included and excluded ICD-11 diagnosis codes, database search strategy, study selection form, assessment tools that guided the occupational engagement component identification, and summaries of methodological assessment of the included trials. [file 7082159.f1.zip]

Archive with 6 entries (6 files):
- Appendix 1. The included and excluded ICD-11 diagnosis codes (1).docx
- Appendix 2. Database search strategy example (1).docx
- Appendix 3. Selection form (1).docx
- Appendix 4. Assessment tools assisting the identification of the occupational engagement component in the sample studies (1).docx
- Appendix 5. Tabular summary of methodological assessment of the included trials (1).pdf
- Appendix 6. Weighted summary plot of the methodological quality assessment with RoB 2-tool (1).pdf
